# Supplementary material
Source: PubMed Central journal article supplement (PMC5445617)

**A****shp53 Induction**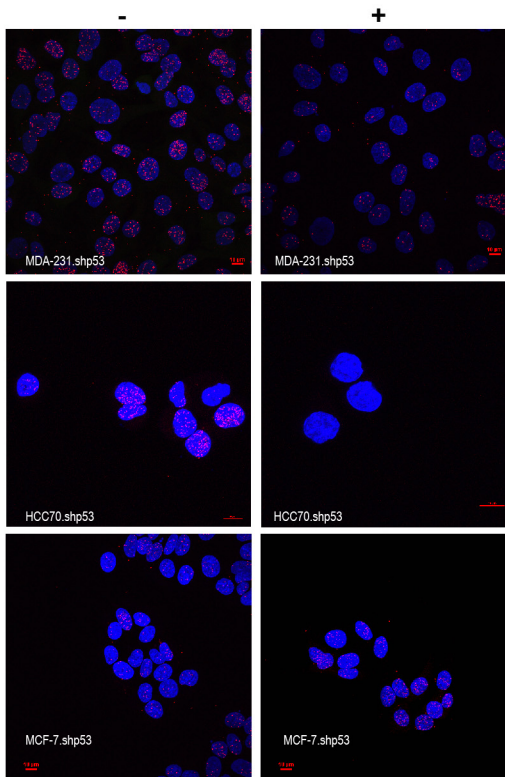**B**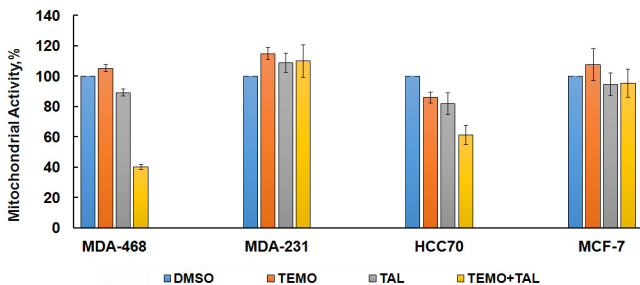

Supplement: 41523_2016_1_MOESM1_ESM.pdf [file 41523_2016_1_MOESM1_ESM.pdf]
